# Supplementary material for: HUWE1 mutations in Juberg-Marsidi and Brooks syndromes: the results of an X-chromosome exome sequencing study
Source: PubMed Central journal article supplement — BMJ Open. 2016 Apr 29;6(4):e009537. doi: 10.1136/bmjopen-2015-009537 (PMC4854010; doi:10.1136/bmjopen-2015-009537), 2016-04-29
Supplement: bmjopen-2015-009537supp_figure1.pdf [file bmjopen-2015-009537supp_figure1.pdf]

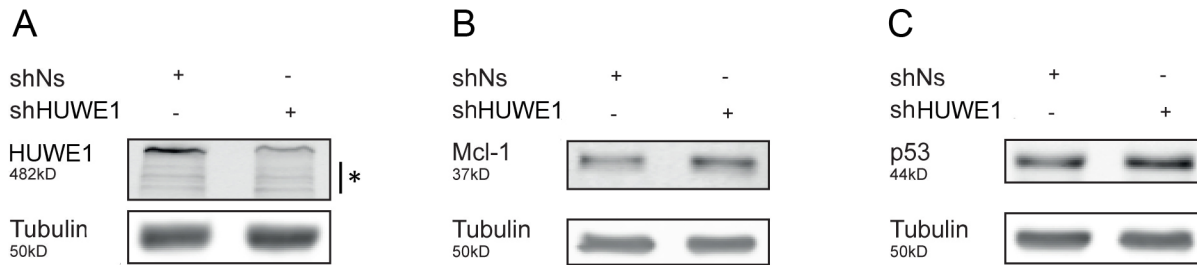

**Supplementary Figure 1.** Protein levels of the well-known Mule (*HUWE1*) substrates Mcl-1 and p53 are stabilized upon Mule knockdown. Immunoblot analysis of Mule (A), Mcl-1 (B) and p53 (C) protein levels in a healthy individual lymphoblastoid cell line expressing non-specific (Ns) or Mule-targeting shRNA. Star in (A) indicates unspecific bands.
