# Supplementary material for: HUWE1 mutations in Juberg-Marsidi and Brooks syndromes: the results of an X-chromosome exome sequencing study
Source: PubMed Central journal article supplement — BMJ Open. 2016 Apr 29;6(4):e009537. doi: 10.1136/bmjopen-2015-009537 (PMC4854010; doi:10.1136/bmjopen-2015-009537), 2016-04-29
Supplement: bmjopen-2015-009537supp_table1.pdf [file bmjopen-2015-009537supp_table1.pdf]

Supplementary Table 1. Predicted Effects of the Alterations in *HUWE1* on Protein Function

| Alteration |            | Mutation Taster | SIFT | PolyPhen-2                |
|------------|------------|-----------------|------|---------------------------|
| p.R4063Q   | c.12188G>A | Disease-causing | NT*  | Probably Damaging (.999)  |
| p.G4310R   | c.12928G>C | Disease-causing | NT   | Probably Damaging (1.000) |
| p.R4013W** | c.12037C>T | Disease-causing | NT   | Probably Damaging (.999)  |
| p.R4187L** | c.12559C>T | Disease-causing | NT   | Probably Damaging (1.000) |
| p.R2981H** | c.8942G>A  | Disease-causing | NT   | Probably Damaging (.999)  |

\*NT- Not Tolerated

\*\*Three missense mutations reported by Froyen et al.[22] and Isrie et al.[23]
